# Supplementary material for: RSM Modeling and Optimization of CO2 Separation from High CO2 Feed Concentration over Functionalized Membrane
Source: MDPI journal article supplement (doi:10.3390/polym14071371), 2022-03-28
Supplement: s1 [file s1]

Article

# RSM Modeling and Optimization of CO<sub>2</sub> Separation from High CO<sub>2</sub> Feed Concentration over Functionalized Membrane

Nadia Hartini Suhaimi <sup>1,2</sup>, Yin Fong Yeong <sup>1,2,\*</sup>, Norwahyu Jusoh <sup>1,2</sup>, Thiam Leng Chew <sup>1,2</sup>,  
Mohammad Azmi Bustam <sup>1,3</sup> and Muhammad Mubashir <sup>4</sup>

<sup>1</sup> Department of Chemical Engineering, Universiti Teknologi PETRONAS, Bandar Seri Iskandar 32610, Malaysia; nadia\_17005943@utp.edu.my (N.H.S.); norwahyu.jusoh@utp.edu.my (N.J.); thiamleng.chew@utp.edu.my (T.L.C.); azmibustam@utp.edu.my (M.A.B.)

<sup>2</sup> CO<sub>2</sub> Research Centre (CO<sub>2</sub>RES), R&D Building, Universiti Teknologi PETRONAS, Bandar Seri Iskandar 32610, Malaysia

<sup>3</sup> Centre of Research in Ionic Liquids (CORIL), Universiti Teknologi PETRONAS, Bandar Seri Iskandar 32610, Malaysia

<sup>4</sup> Department of Petroleum Engineering, Faculty of Computing, Engineering & Technology, School of Engineering, Asia Pacific University of Technology, and Innovation, Kuala Lumpur 57000, Malaysia; mubashir@apu.edu.my

\* Correspondence: yinfong.yeong@utp.edu.my

## Contents

1. Supplementary Tables S1 and S2
2. Supplementary Figures S1 and S2

**Table S1.** The FFV values and single gas permeation performance of membranes.

| Membrane                                         | CO <sub>2</sub> Permeability (Barrer) | CH <sub>4</sub> Permeability (Barrer) | CO <sub>2</sub> /CH <sub>4</sub> Separation Factor | Fractional Free Volume (FFV) | Ref. |
|--------------------------------------------------|---------------------------------------|---------------------------------------|----------------------------------------------------|------------------------------|------|
| 6FDA-durene                                      | 510.3                                 | 59.3                                  | 8.6                                                | 0.1981                       | [1]  |
| 7.0 wt NH <sub>2</sub> -MIL-125 (Ti)/6FDA-durene | 1115.7                                | 30.1                                  | 37.1                                               | 0.2665                       | [1]  |

References:

1. Suhaimi, N. H., et al. (2020). "Separation of CO<sub>2</sub> from CH<sub>4</sub> using mixed matrix membranes incorporated with amine functionalized MIL-125 (Ti) nanofiller." Chemical Engineering Research and Design 159: 236-247.

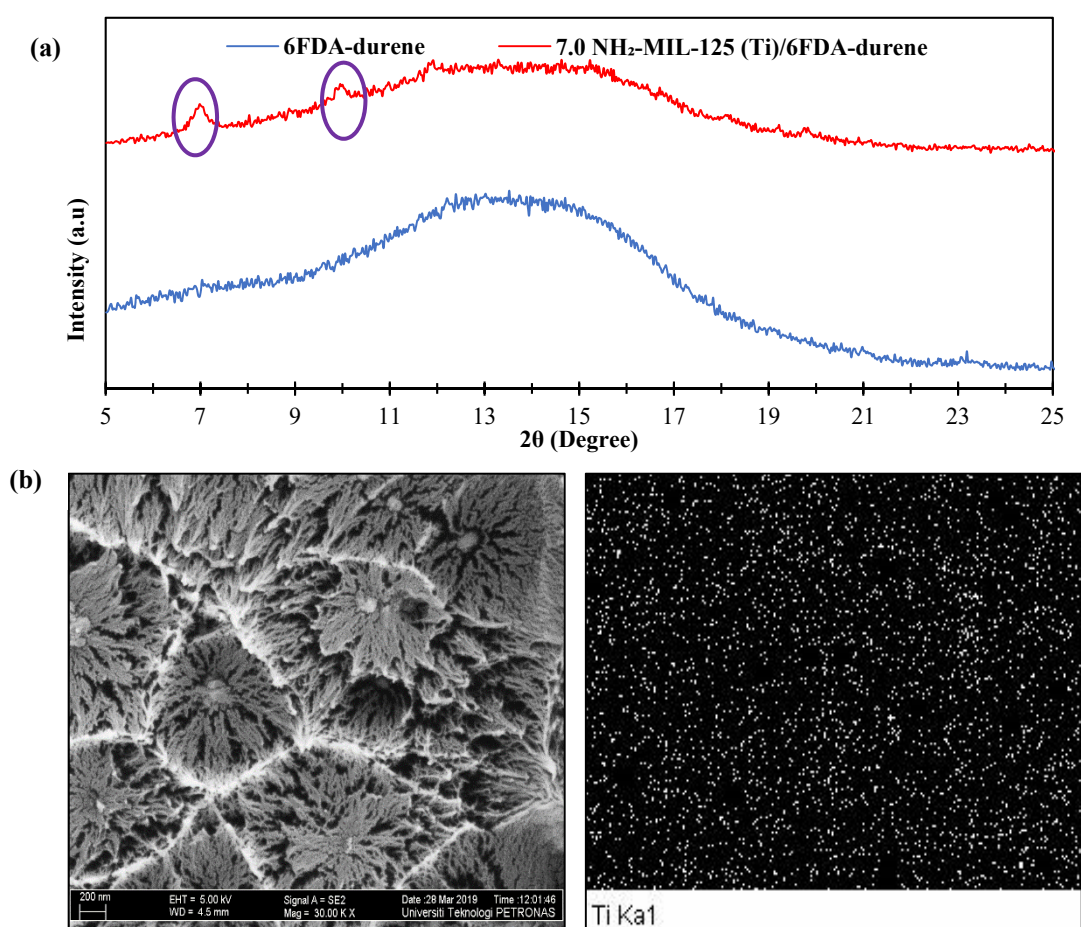

**Figure S1.** The structural properties of the 7.0 wt NH<sub>2</sub>-MIL-125 (Ti)/6FDA-durene membrane including XRD (a), FESEM and EDX (b) [1].

References:

1. Suhaimi, N. H., et al. (2020). "Separation of CO<sub>2</sub> from CH<sub>4</sub> using mixed matrix membranes incorporated with amine functionalized MIL-125 (Ti) nanofiller." Chemical Engineering Research and Design 159: 236-247.

**Table S2.** The actual and predicted values of the membrane separation performances with percentage of error.

| Run | CO <sub>2</sub> Permeability (Barrer) |           |           | CH <sub>4</sub> Permeability (Barrer) |           |           | CO <sub>2</sub> /CH <sub>4</sub> Separation Factor |           |           |
|-----|---------------------------------------|-----------|-----------|---------------------------------------|-----------|-----------|----------------------------------------------------|-----------|-----------|
|     | Actual                                | Predicted | Error (%) | Actual                                | Predicted | Error (%) | Actual                                             | Predicted | Error (%) |
| 1   | 569.55                                | 518.81    | 9.78      | 58.26                                 | 59.71     | 2.43      | 9.85                                               | 9.37      | 5.07      |
| 2   | 569.55                                | 518.81    | 9.78      | 58.26                                 | 59.71     | 2.43      | 9.85                                               | 9.37      | 5.07      |
| 3   | 326.19                                | 323.62    | 0.80      | 52.33                                 | 54.99     | 4.83      | 5.49                                               | 5.22      | 5.18      |
| 4   | 609.06                                | 615.35    | 1.02      | 81.94                                 | 81.82     | 0.14      | 7.29                                               | 8.06      | 9.59      |
| 5   | 450.15                                | 471.01    | 4.43      | 92.68                                 | 84.32     | 9.91      | 5.95                                               | 6.04      | 1.55      |
| 6   | 503.91                                | 495.98    | 1.60      | 39.86                                 | 38.29     | 4.10      | 12.83                                              | 13.26     | 3.21      |
| 7   | 448.24                                | 479.82    | 6.58      | 33.94                                 | 34.04     | 0.29      | 13.01                                              | 11.71     | 11.09     |
| 8   | 293.24                                | 296.39    | 1.06      | 36.16                                 | 34.59     | 4.53      | 7.39                                               | 7.46      | 0.92      |
| 9   | 506.56                                | 518.81    | 2.36      | 83.20                                 | 59.71     | 39.34     | 6.08                                               | 9.37      | 35.15     |
| 10  | 419.72                                | 399.82    | 4.98      | 39.74                                 | 45.43     | 12.53     | 8.63                                               | 9.03      | 4.46      |
| 11  | 794.37                                | 804.80    | 1.30      | 147.46                                | 141.77    | 4.01      | 5.25                                               | 4.98      | 5.45      |
| 12  | 442.92                                | 437.76    | 1.18      | 39.48                                 | 47.81     | 17.43     | 8.56                                               | 8.66      | 1.10      |
| 13  | 502.30                                | 518.81    | 3.18      | 47.43                                 | 59.71     | 20.57     | 10.78                                              | 9.37      | 14.99     |
| 14  | 321.47                                | 364.50    | 11.80     | 28.65                                 | 20.30     | 41.14     | 11.37                                              | 10.75     | 5.77      |
| 15  | 464.43                                | 457.54    | 1.51      | 58.41                                 | 55.76     | 4.76      | 8.06                                               | 8.46      | 4.75      |
| 16  | 650.19                                | 667.20    | 2.55      | 97.03                                 | 105.37    | 7.91      | 8.35                                               | 7.73      | 8.00      |
| 17  | 520.32                                | 518.81    | 0.29      | 55.54                                 | 59.71     | 6.99      | 9.32                                               | 9.37      | 0.59      |
| 18  | 567.47                                | 554.85    | 2.27      | 74.33                                 | 75.90     | 2.07      | 7.53                                               | 7.59      | 0.82      |
| 19  | 520.32                                | 518.81    | 0.29      | 55.54                                 | 59.71     | 6.99      | 9.32                                               | 9.37      | 0.59      |
| 20  | 510.11                                | 508.58    | 0.30      | 90.97                                 | 92.55     | 1.70      | 6.12                                               | 5.83      | 5.05      |

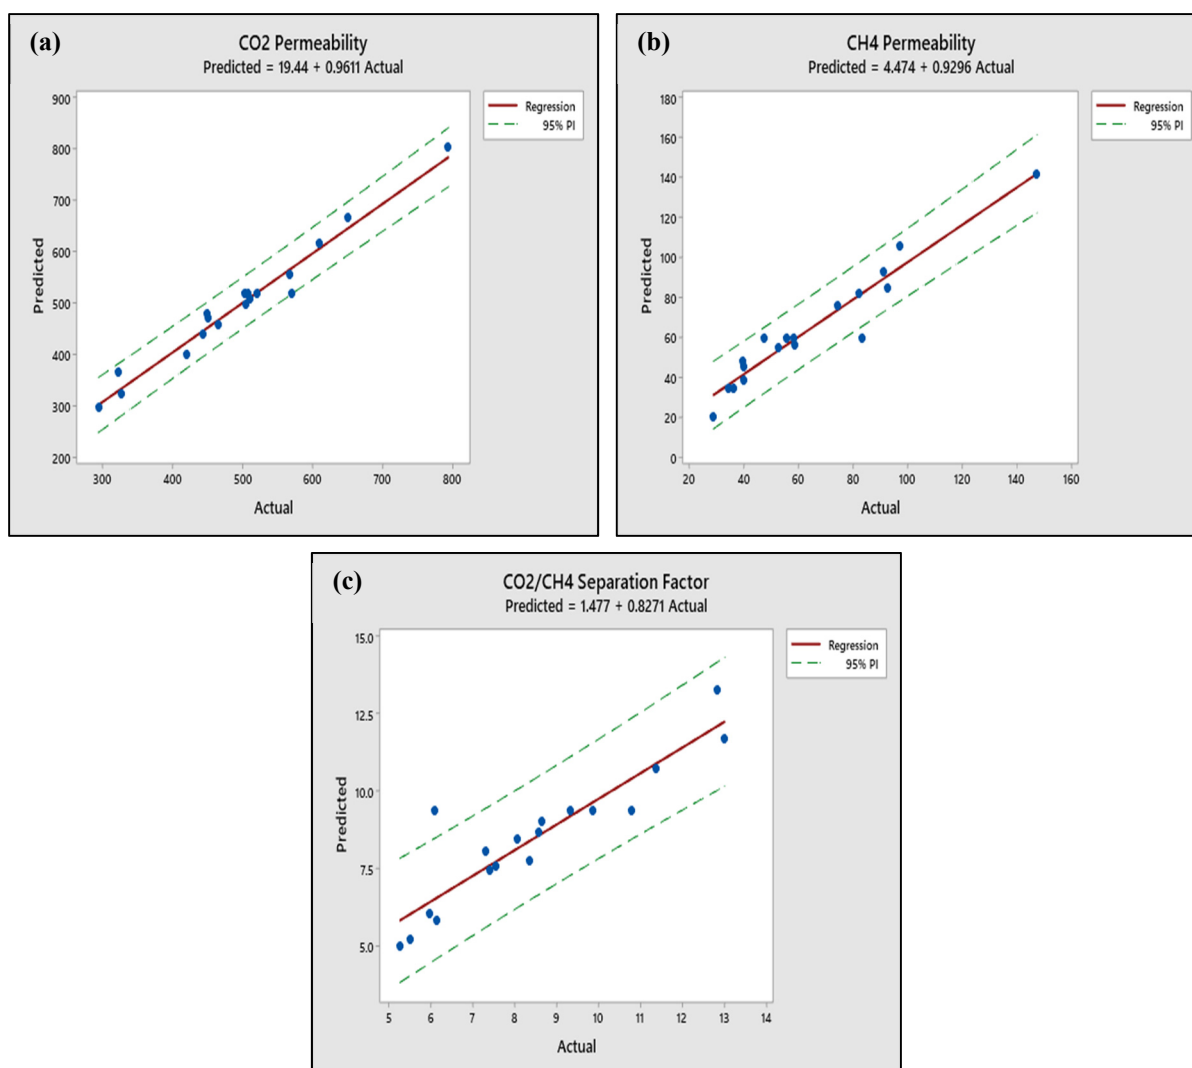

**Figure S2.** The parity plot of predicted and actual data for the model of (a) CO<sub>2</sub> permeability, (b) CH<sub>4</sub> permeability, and (c) CO<sub>2</sub>/CH<sub>4</sub> separation factor with a 95% prediction interval.
